# Supplementary material for: Dispensing of Non-Prescribed Antibiotics from Community Pharmacies of Pakistan: A Cross-Sectional Survey of Pharmacy Staff’s Opinion
Source: PubMed Central journal article supplement (PMC8143445; doi:10.3390/antibiotics10050482), 2021-04-22
Supplement: antibiotics-10-00482-s001.pdf [file antibiotics-10-00482-s001.pdf]

- Patients visit physicians only in the case of serious infection
- Increases the profit and sales
- Lack of patients' affordability for doctors' consultation fee
- Fear of customer loss
- Unawareness of pharmacy staff toward policy and regulations to halt DoNA
- Other \_\_\_\_\_ (Please mention)

12. Please mention the name of commonly dispensed non prescribed antibiotic

- |           |           |
|-----------|-----------|
| 1. _____  | 2. _____  |
| 3. _____  | 4. _____  |
| 5. _____  | 6. _____  |
| 7. _____  | 8. _____  |
| 9. _____  | 10. _____ |
| 11. _____ | 12. _____ |
| 13. _____ | 14. _____ |

13. Please mention the dosage of commonly dispensed non prescribed antibiotic.

- |          |          |
|----------|----------|
| 1. _____ | 2. _____ |
| 3. _____ | 4. _____ |
| 5. _____ | 6. _____ |

14. Please mention the diseases for which non prescribed antibiotic are dispensed.

- |          |           |
|----------|-----------|
| 1. _____ | 2. _____  |
| 3. _____ | 4. _____  |
| 5. _____ | 6. _____  |
| 7. _____ | 8. _____  |
| 9. _____ | 10. _____ |

Please tick (✓) the relevant

| Measures                                                  | Response                        |                                      |                                    |  |
|-----------------------------------------------------------|---------------------------------|--------------------------------------|------------------------------------|--|
| 15. Before DoNA, I inquire the drug allergies to patients | Always <input type="checkbox"/> | Very often <input type="checkbox"/>  | Some time <input type="checkbox"/> |  |
|                                                           | Rarely <input type="checkbox"/> | Very rarely <input type="checkbox"/> | Never <input type="checkbox"/>     |  |

|                                                                                         |                                 |                                      |                                    |
|-----------------------------------------------------------------------------------------|---------------------------------|--------------------------------------|------------------------------------|
| 16. Before DoNA , I inquire about the renal condition of patients                       | Always <input type="checkbox"/> | Very often <input type="checkbox"/>  | Some time <input type="checkbox"/> |
|                                                                                         | Rarely <input type="checkbox"/> | Very rarely <input type="checkbox"/> | Never <input type="checkbox"/>     |
| 17. Before DoNA, I ask the patient about other disease/s or therapies                   | Always <input type="checkbox"/> | Very often <input type="checkbox"/>  | Some time <input type="checkbox"/> |
|                                                                                         | Rarely <input type="checkbox"/> | Very rarely <input type="checkbox"/> | Never <input type="checkbox"/>     |
| 18. At the time of DoNA, I inform the patients about possible side effects              | Always <input type="checkbox"/> | Very often <input type="checkbox"/>  | Some time <input type="checkbox"/> |
|                                                                                         | Rarely <input type="checkbox"/> | Very rarely <input type="checkbox"/> | Never <input type="checkbox"/>     |
| 19. At the time of DoNA, I counsel the patients for medication adherence and compliance | Always <input type="checkbox"/> | Very often <input type="checkbox"/>  | Some time <input type="checkbox"/> |
|                                                                                         | Rarely <input type="checkbox"/> | Very rarely <input type="checkbox"/> | Never <input type="checkbox"/>     |
| 20. I don't dispense non-prescribed antibiotics for children                            | Always <input type="checkbox"/> | Very often <input type="checkbox"/>  | Some time <input type="checkbox"/> |
|                                                                                         | Rarely <input type="checkbox"/> | Very rarely <input type="checkbox"/> | Never <input type="checkbox"/>     |
| 21. I don't dispense non-prescribed antibiotics for pregnant women                      | Always <input type="checkbox"/> | Very often <input type="checkbox"/>  | Some time <input type="checkbox"/> |
|                                                                                         | Rarely <input type="checkbox"/> | Very rarely <input type="checkbox"/> | Never <input type="checkbox"/>     |

#### Part 4 : Suggestions to halt DoNA

Please tick ( ✓ ) the relevant

22. What you suggest to control DoNA from community pharmacies

- Pharmacy retailers should penalized for DoNA
- Vigilance of pharmacies by drug inspectors should be more strong
- Pharmacy retailers need continuous training about AMR
- Other \_\_\_\_\_ (Please mention)

23. What should be the role of pharmacy retailers to halt the use of non-prescribed antibiotics

- Educate patients about the outcome and AMR due DoNA
- Educate and train the staff of pharmacy about the outcome and AMR due DoNA
- Arranging awareness seminars during the meetings of Chemist and Druggist Associations
- Arrange public awareness campaigns
- Other \_\_\_\_\_ (Please mention)

*Thank you so much for your precious time.*
